# Supplementary material for: Deletion of Cytoplasmic Double-Stranded RNA Sensors Does Not Uncover Viral Small Interfering RNA Production in Human Cells
Source: PubMed Central journal article supplement (PMC5557678; doi:10.1128/msphere.00333-17), 2017-08-16

RIG-I

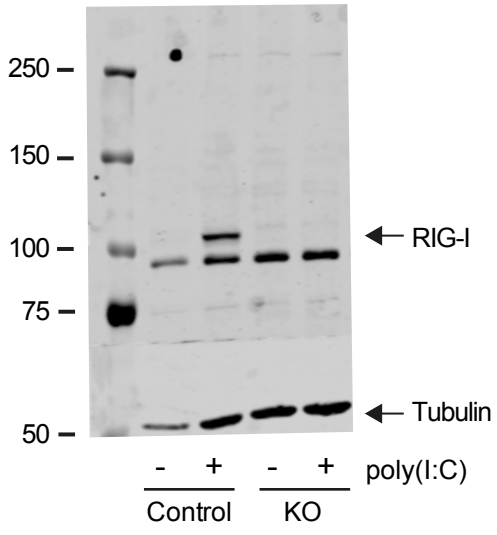

MDA5

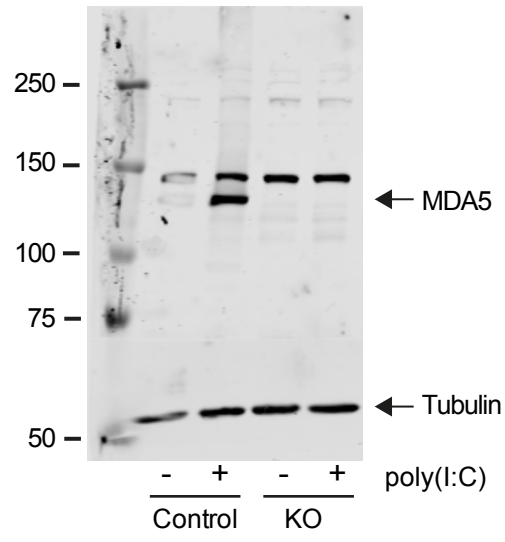

Supplement: sph004172342sf2.pdf [file sph004172342sf2.pdf]
